# Supplementary material for: The diurnal variability of sulfate and nitrate aerosols during wintertime in the Indo-Gangetic Plain: implications for heterogeneous phase chemistry
Source: Royal Society of Chemistry journal article supplement (doi:10.1039/c6ra19595d), 2016-01-01
Supplement: c6ra19595d1.pdf [file c6ra19595d1.pdf]

## Supplementary File

(Rajput et al., 2016\_RSC Advances)

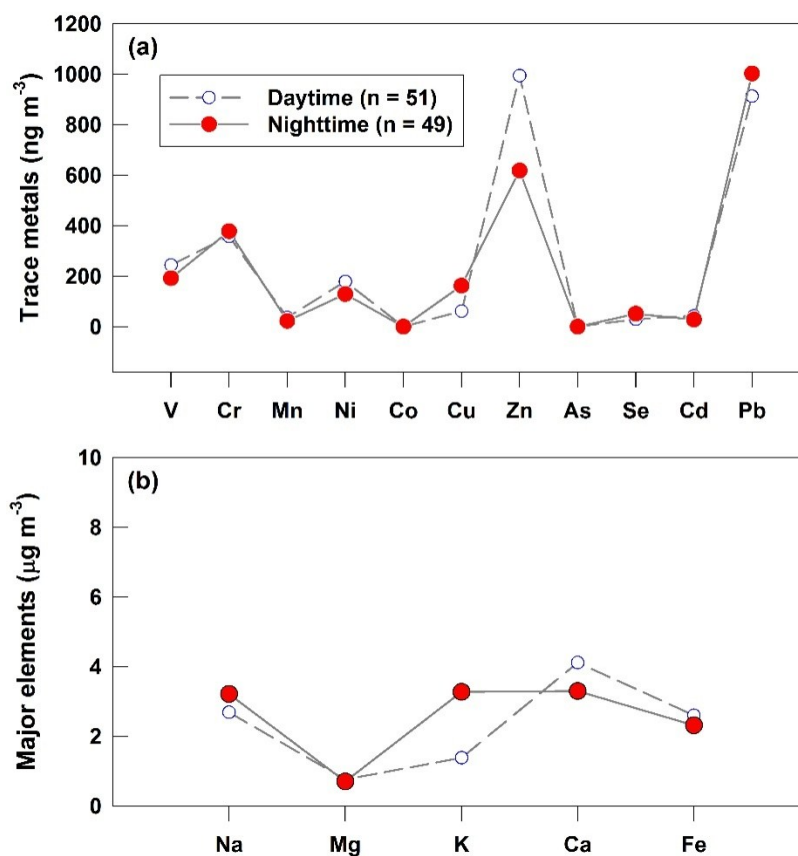

4

5 **Fig. S1** Temporal variability records of: (a) trace metals and (b) major elements in PM<sub>1</sub> at study  
6 location (Kanpur).

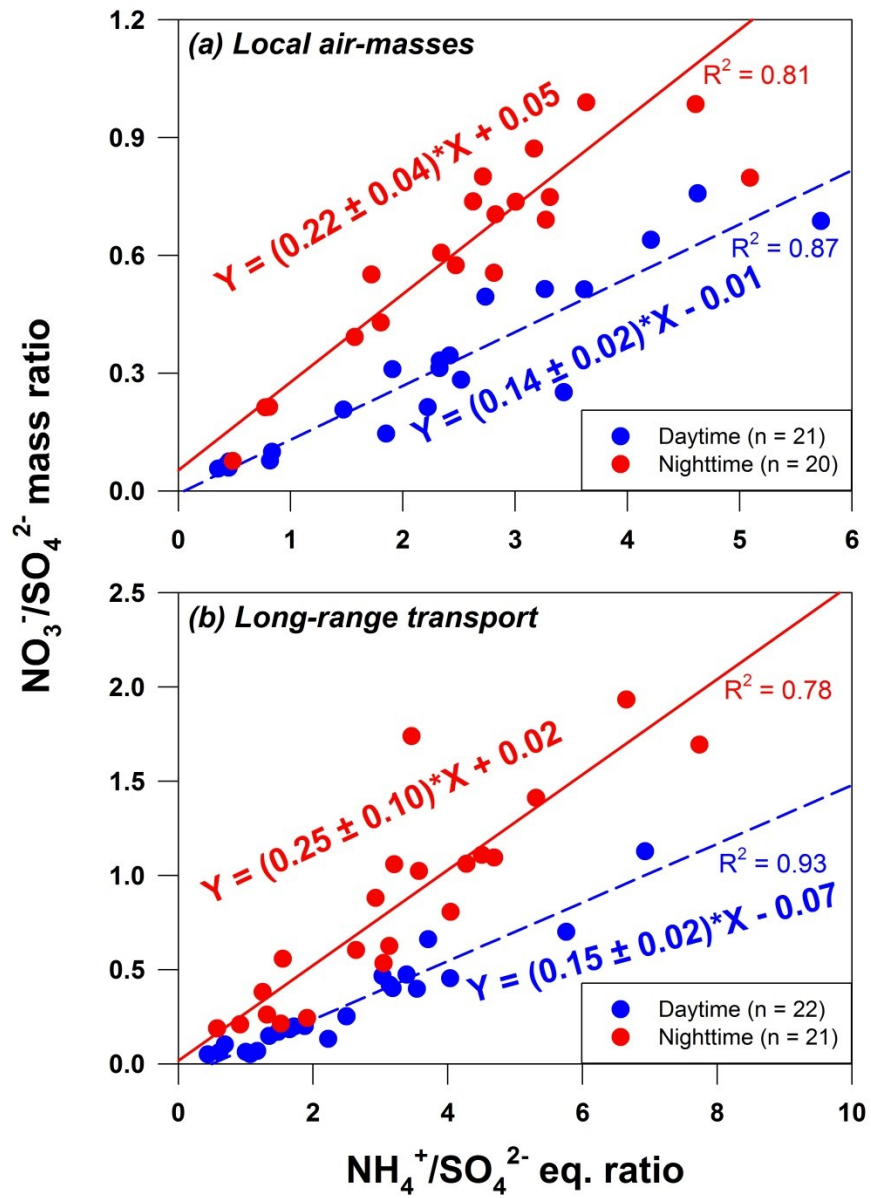

7

8 **Fig. S2** Scatter plot showing excess (xs)- $\text{NH}_4^+$  correlates with enhanced formation of  $\text{NO}_3^-$  both  
 9 during day and nighttime.

10 **Residual analysis for heterogeneous-phase formation of sulfate and nitrate:**

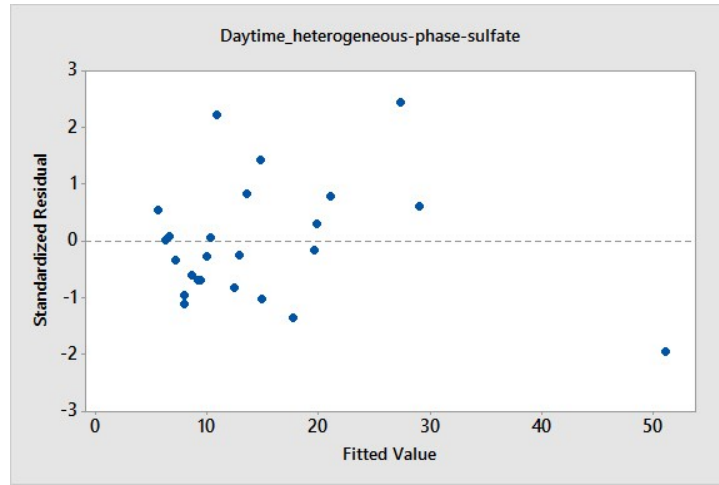

11

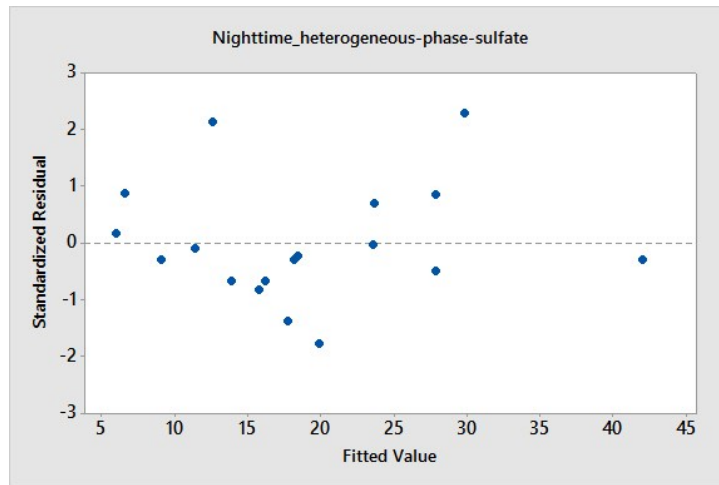

12

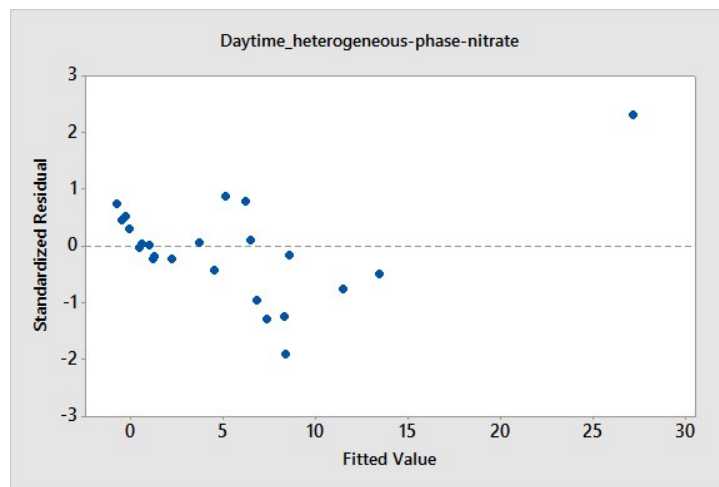

13

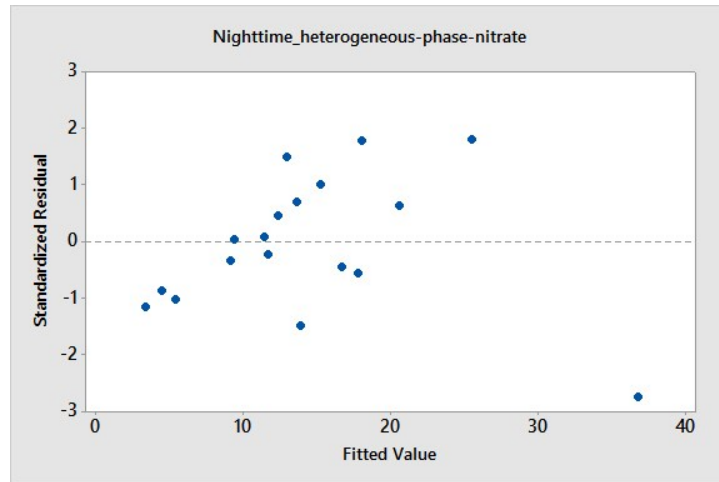

14

15 **Fig. S3** Residual analyses for heterogeneous-phase formation of sulfate and nitrate in  $PM_{10}$  at  
16 Kanpur (IGP).

17 **Residual analysis for aqueous-phase formation of sulfate and nitrate:**

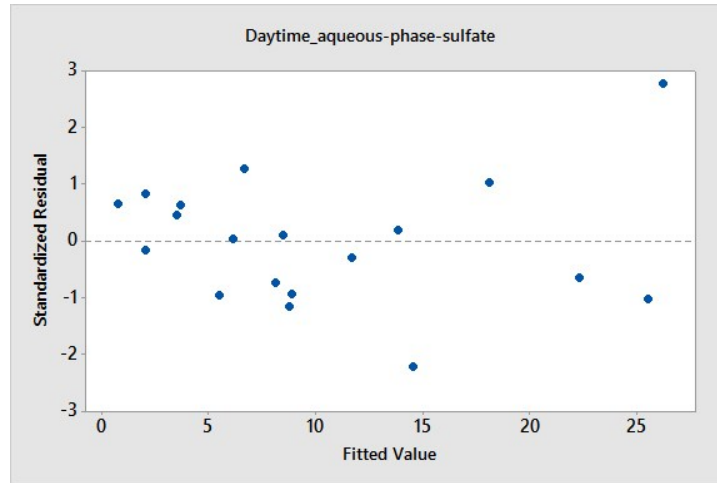

18

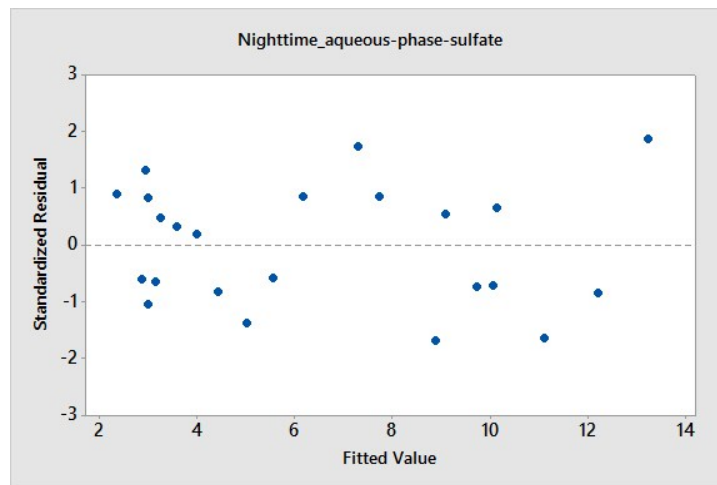

19

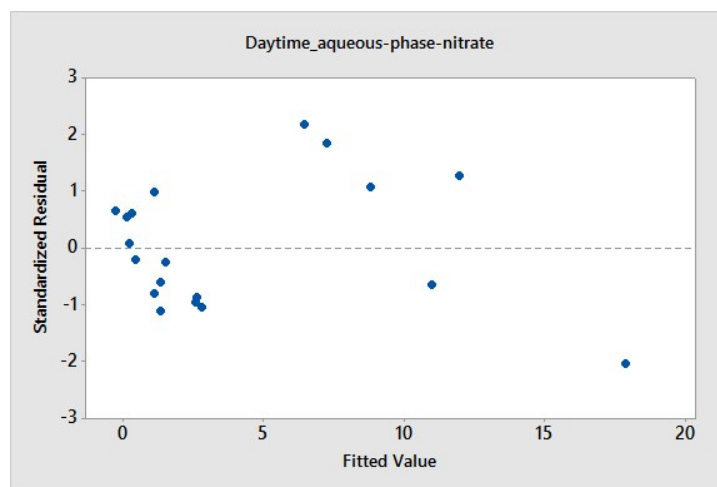

20

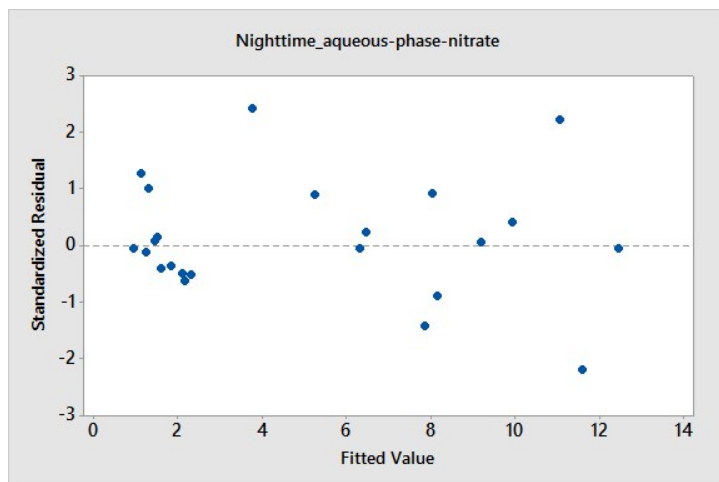

21

22 **Fig. S4** Residual analyses for aqueous-phase formation of sulfate and nitrate in PM<sub>1</sub> at Kanpur

23 (IGP)
